# Supplementary material for: Synthesis, characterization and electroluminescence studies of cyanopyridine-based π-conjugative polymers carrying benzo[c][1,2,5]thiadiazole and naphtho[1,2-c:5,6-c′]bis([1,2,5]thiadiazole) units
Source: Royal Society of Chemistry journal article supplement (doi:10.1039/d0nj02141e), 2020-01-01
Supplement: d0nj02141e1.pdf [file d0nj02141e1.pdf]

# Synthesis, characterization and electroluminescence studies of cyanopyridine-based $\pi$ -conjugative polymers carrying benzo[c][1,2,5]thiadiazole and naphtho[1,2-c:5,6-c']bis([1,2,5]thiadiazole) units

Naveenchandra Pilicode <sup>a,#</sup>, Praveen Naik <sup>a,#</sup>, Madhukara Acharya <sup>a</sup>, Airody Vasudeva Adhikari <sup>b,\*</sup>

<sup>a</sup>*Organic Materials Laboratory, Department of Chemistry, National Institute of Technology Karnataka, Surathkal, Mangalore-575 025, India*

<sup>b</sup>*Yenepoya Research Centre, Yenepoya deemed to be University, Deralakatte, Mangalore-575 018, India*

*\*(Corresponding Author: email id: [avachem@gmail.com](mailto:avachem@gmail.com) and [avache@yenepoya.edu.in](mailto:avache@yenepoya.edu.in))*

<sup>#</sup> Contributed equally

## Contents

|    |                                      |         |
|----|--------------------------------------|---------|
| 1. | Synthesis                            | 02      |
| 2. | Characterization (FTIR, NMR and GPC) | 03 - 10 |
| 3. | CV Traces of polymers                | 11      |
| 4. | Optical Spectra of polymers          | 11-13   |
| 4. | DFT Calculations                     | 13-20   |
| 5. | Device fabrication                   | 20-21   |

## 1. Synthesis

### *Synthesis of 4,6-bis-(3'-formyl-biphenyl-4-yl)-2-heptyloxy-nicotinonitrile (Cy<sub>1</sub>)*

Compound **3** (0.33 g, 0.767 mmol) was dissolved in 8 mL of DMF. 1-Bromoheptane (0.15 mL, 0.777 mmol) was then added, followed by 148 mg of potassium carbonate (1.072 mmol) and the reaction mixture was stirred at 90 °C for overnight. The reaction mixture was cooled and poured into ice cold water with constant stirring. The obtained precipitate was filtered, washed with water and dried to obtain creamy yellow dibromo derivative of O-alkylated cyanopyridine (monomer) **Cy<sub>1</sub>**. The obtained crude product was dissolved in a minimum amount of CHCl<sub>3</sub>, followed by re-precipitation using methanol to get the pure monomer. Finally, it was recrystallized from CHCl<sub>3</sub> and methanol mixture. Yield: 280 mg, 75%. FTIR (cm<sup>-1</sup>): 1540 (C=O), 2219 (C≡N), 2918 (Aromatic CH stretching). <sup>1</sup>H NMR (300 MHz, CDCl<sub>3</sub>, δ ppm) : 0.88 (t, J = 4.8 Hz, 3H), 1.33 (t, J = 6.4 Hz, 3H), 1.39 (t, J = 4Hz, 3H), 1.51 (d, J = 7.2 Hz, 2H), 1.89 (m, J = 6.8 Hz, 2H), 4.576 (t, J = 6.4 Hz, 2H), 7.26 (s, 1H) 7.52 (d, J = 6.8 Hz, 2H), 7.61 (d, J = 2 Hz, 1H), 7.63 (d, J = 2 Hz, 1H), 7.66 (d, J = 2 Hz, 1H), 7.68 (d, J = 2 Hz, 1H), 7.92 (d, J = 2 Hz, 1H), 7.94 (d, J = 2 Hz, 1H). ESI-MS, exact mass calculated for (C<sub>25</sub>H<sub>24</sub>Br<sub>2</sub>N<sub>2</sub>O), [M+H]<sup>+</sup>: 528.28; Found : 529.4. Elemental Anal. Calcd (%) for C<sub>25</sub>H<sub>24</sub>Br<sub>2</sub>N<sub>2</sub>O: C, 56.84; H, 4.58; N, 5.30; Found: C, 56.82; H, 5.54; N, 5.33.

### *Synthesis of 1,4-bis-(2'-formyl-phenylene-thiophene-5-yl)-2-hexadecoxyl-nicotinonitrile (Cy<sub>2</sub>)*

Compound, 2,5-bis(4-bromothiophene)-2-hydroxypyridine-3-carbonitrile (**6**, 0.5 g, 1.131 mmol) was dissolved in 8 mL of DMF. To this 1-bromohexadecane (0.35 mL, 1.146 mmol) was then added, followed by 148 mg of potassium carbonate (1.072 mmol) and the reaction mixture was stirred at 80 °C for overnight. Progress of the reaction was monitored using TLC. It was then cooled and poured onto 150 mL of ice cold water with constant stirring. The obtained precipitate was filtered, washed with water and dried to obtain creamy yellow product. It was recrystallized using chloroform-methanol to give product, **Cy<sub>2</sub>**. Yield 75%; mp 71.1 °C; ATR-IR (cm<sup>-1</sup>): 2220 (C≡N), 2919 (C-H). <sup>1</sup>H NMR (300 MHz, CDCl<sub>3</sub>, δ ppm): 0.81-1.86 (m, 31H), 4.56-4.58 (t, 2H), 7.73-7.86 (m, 5H). Elemental Anal. Calcd (%) for C<sub>30</sub>H<sub>38</sub>Br<sub>2</sub>N<sub>2</sub>OS<sub>2</sub>: C, 54.06; H, 5.75; N, 4.20; Found: C, 54.05; H, 5.76; N, 4.21.

## 2. Characterization (FTIR, NMR and GPC)

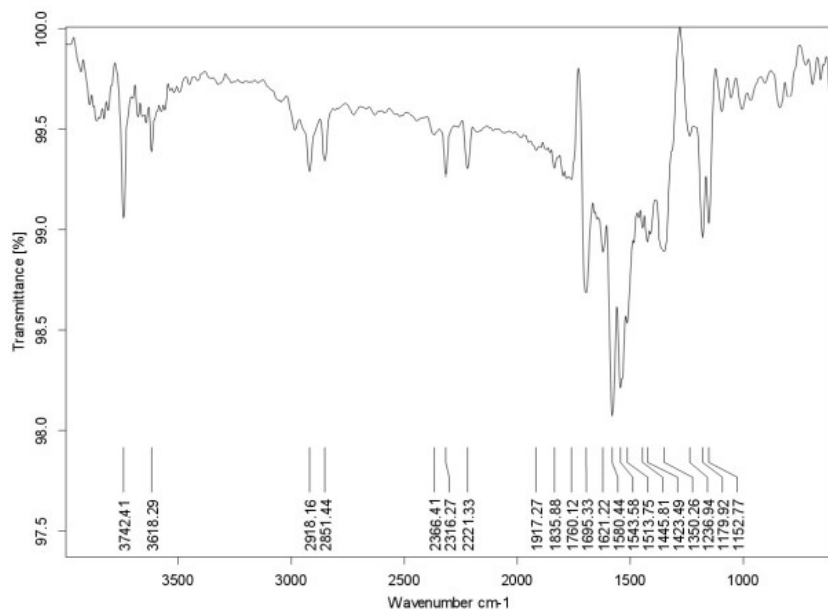

Fig S1: FTIR spectrum of monomer  $Cy_1$

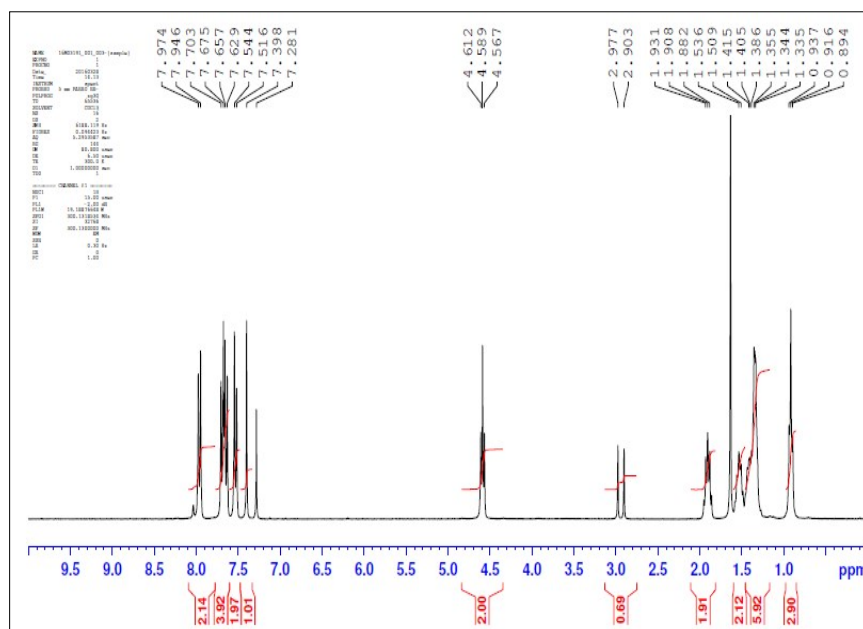

Fig S2:  $^1H$  NMR spectrum of monomer  $Cy_1$

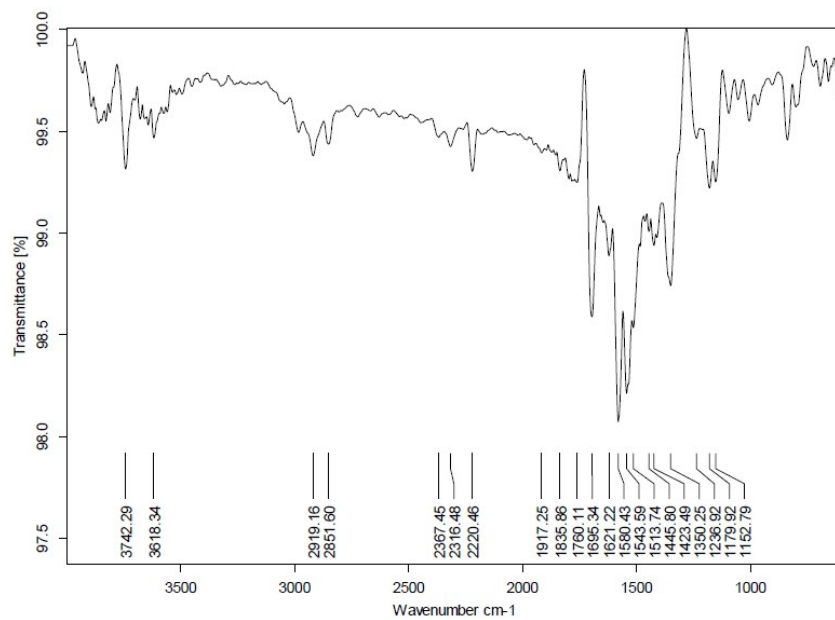

**Fig S3:** FTIR spectrum of intermediate  $Cy_2$

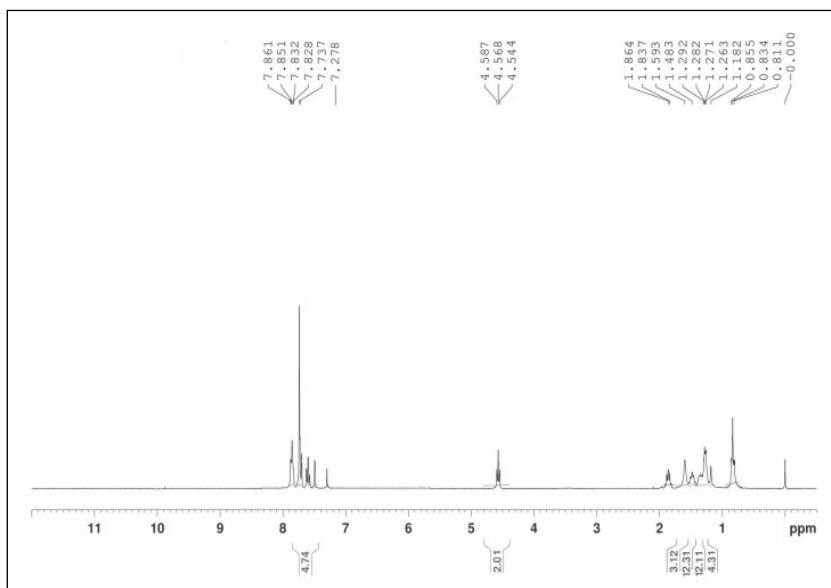

**Fig S4:**  $^1H$  NMR spectrum of intermediate  $Cy_2$

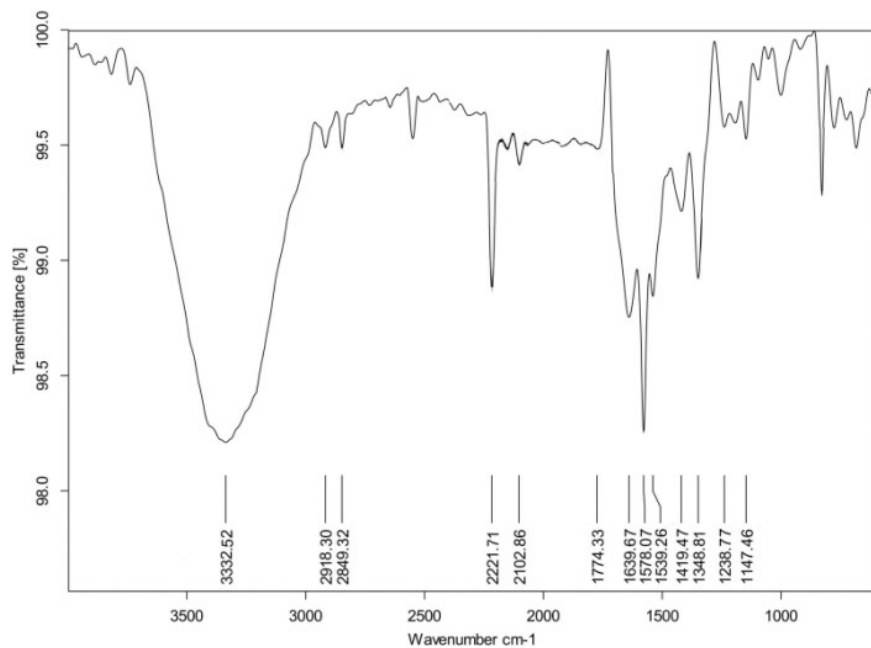

**Fig S5:** FTIR spectrum of polymer **TDPy<sub>1</sub>**

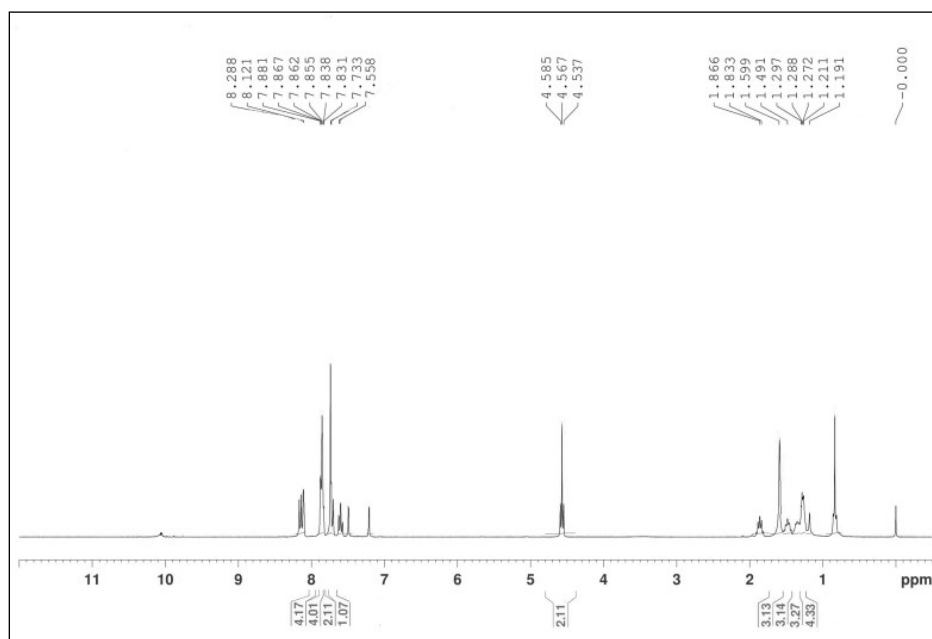

**Fig S6:** <sup>1</sup>H NMR spectrum of polymer **TDPy<sub>1</sub>**

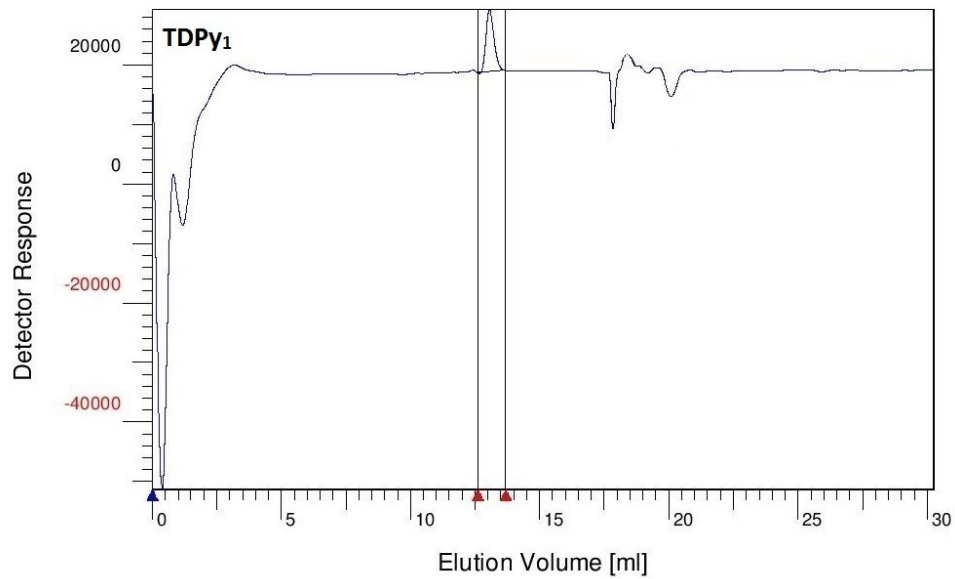

**Fig S7:** GPC plot of polymer TDPy<sub>1</sub>

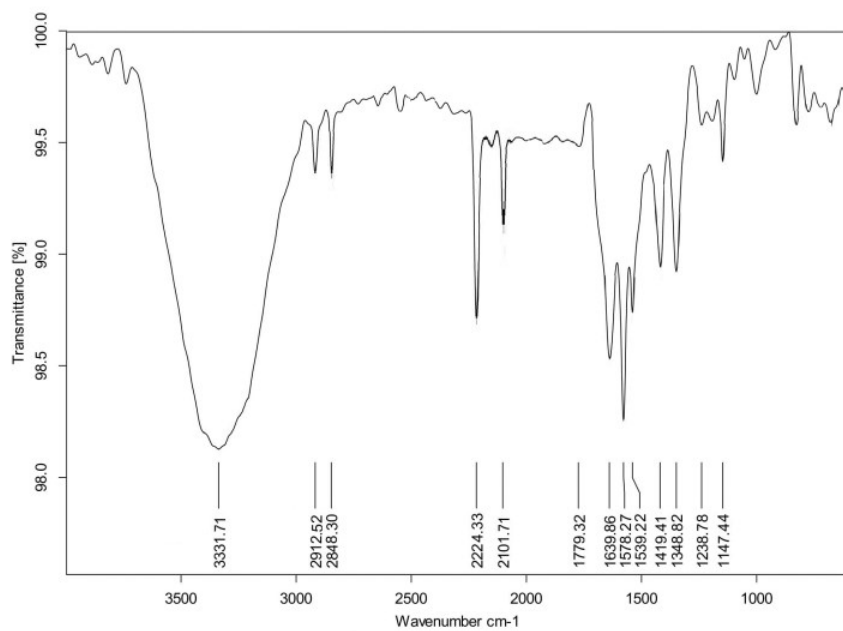

**Fig S8:** FTIR spectrum of polymer TDPy<sub>2</sub>

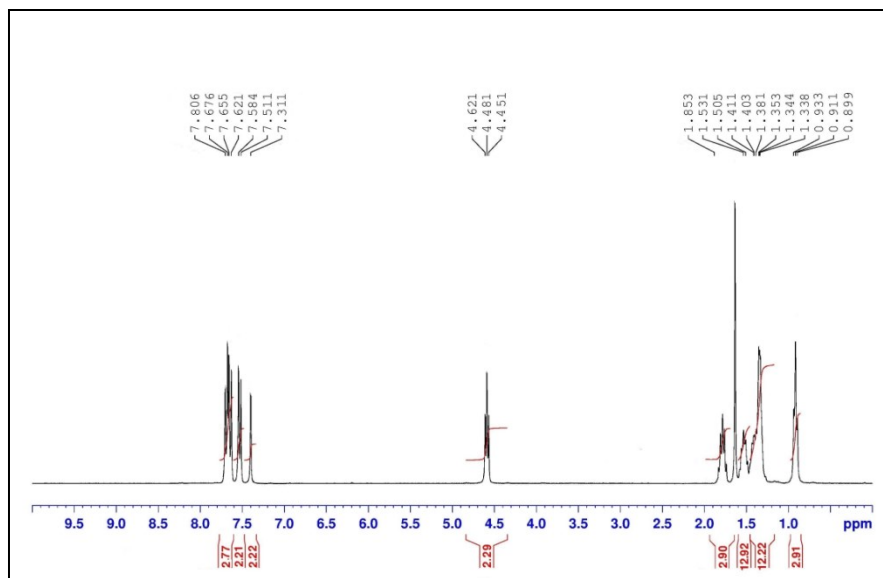

**Fig S9:**  $^1\text{H}$  NMR spectrum of polymer **TDPy<sub>2</sub>**

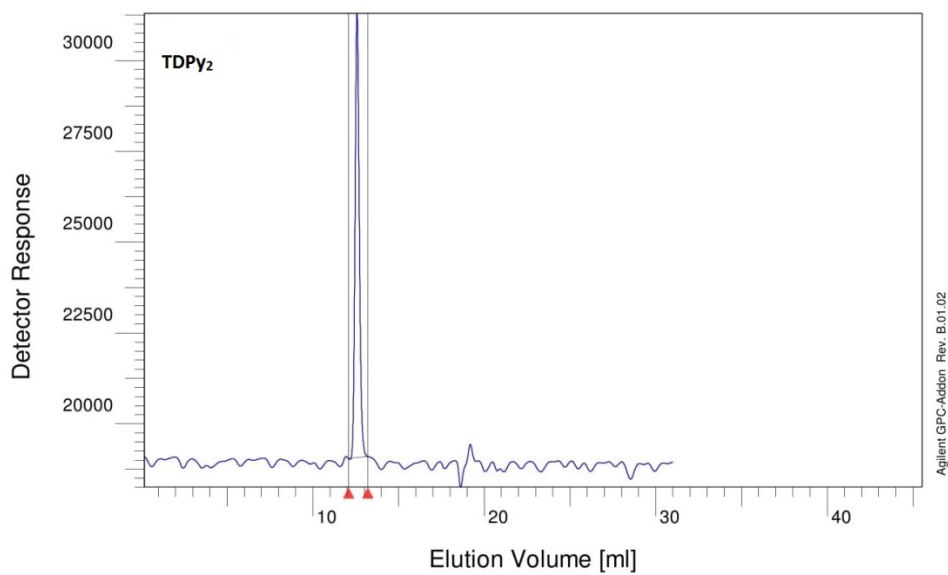

**Fig S10:** GPC plot of polymer **TDPy<sub>2</sub>**

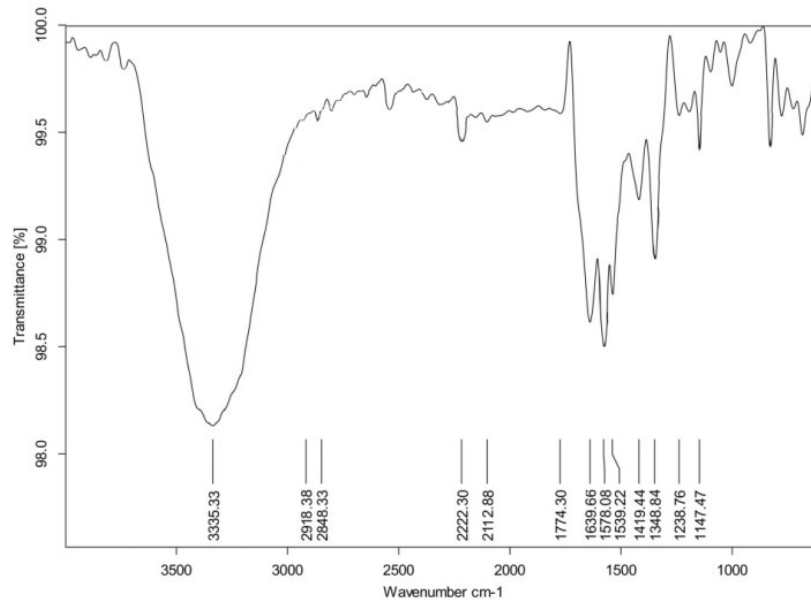

**Fig S11:** FTIR spectrum of polymer **TDPy<sub>3</sub>**

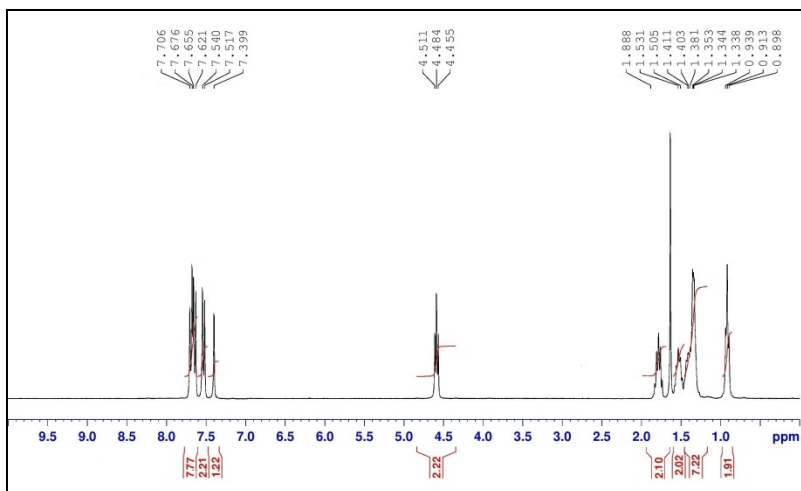

**Fig S12:** <sup>1</sup>H NMR spectrum of polymer **TDPy<sub>3</sub>**



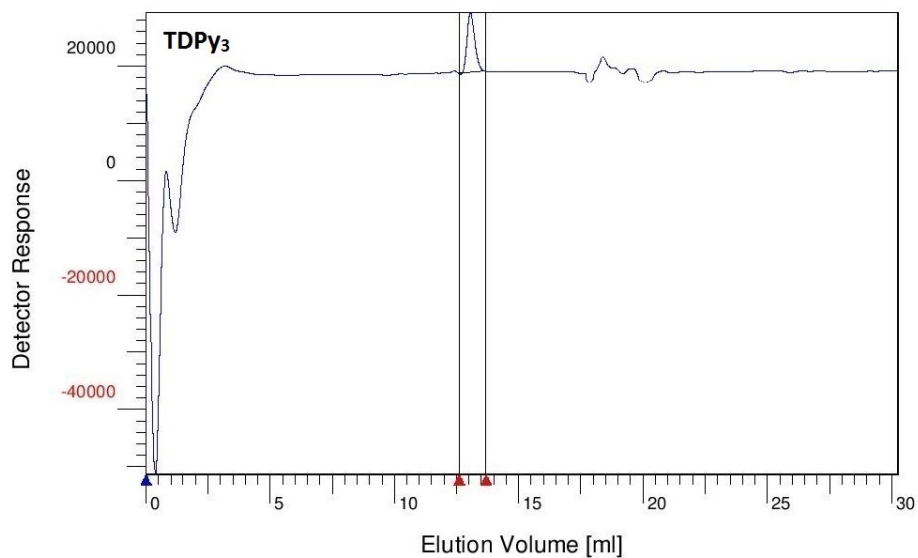

**Fig S13: GPC plot of polymer TDPy<sub>3</sub>**

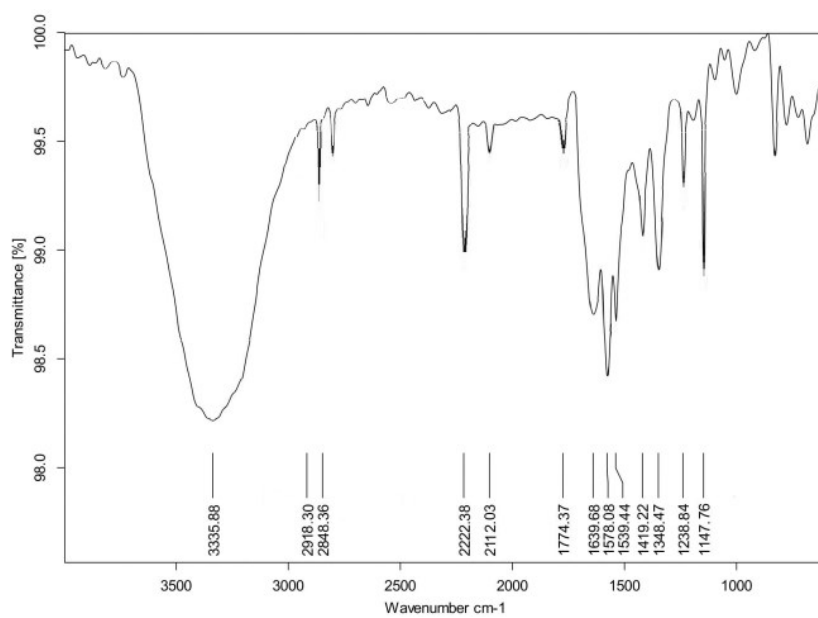

**Fig S14: FTIR spectrum of polymer TDPy<sub>4</sub>**

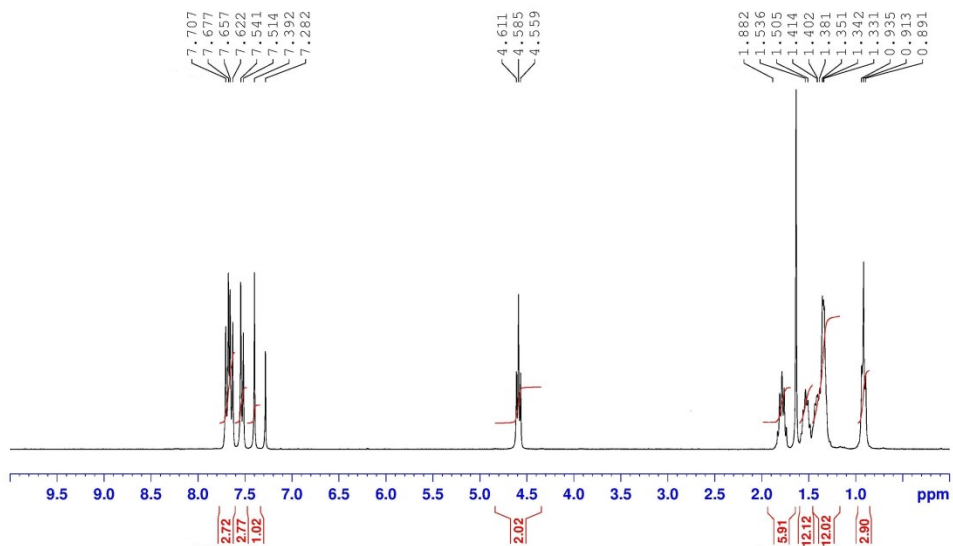

**Fig S15:**  $^1\text{H}$  NMR spectrum of polymer **TDPy<sub>4</sub>**

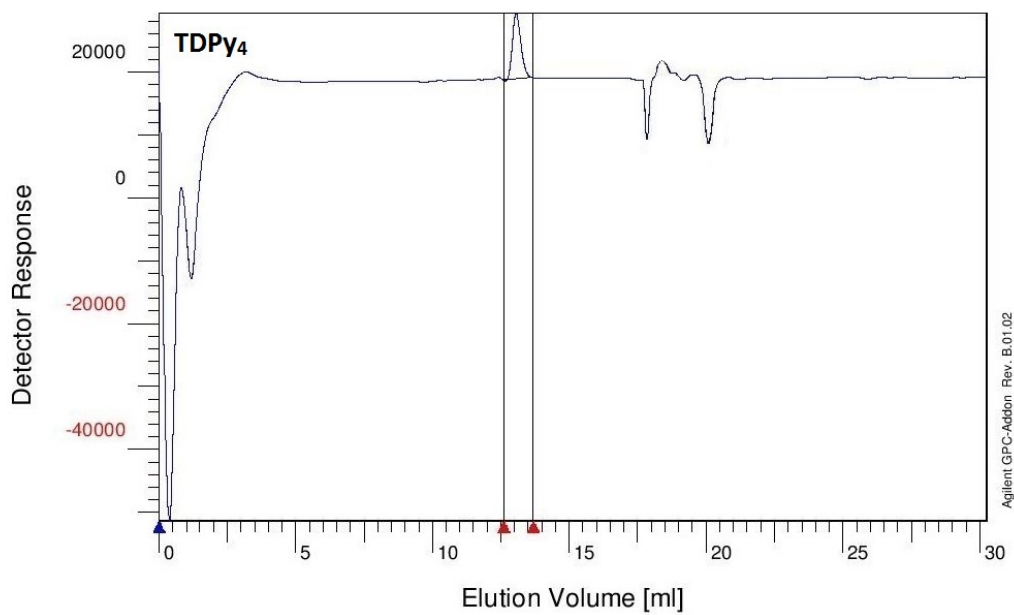

**Fig S16:** GPC plot of polymer **TDPy<sub>4</sub>**

### 3. CV traces of polymers TDPy<sub>1-4</sub>

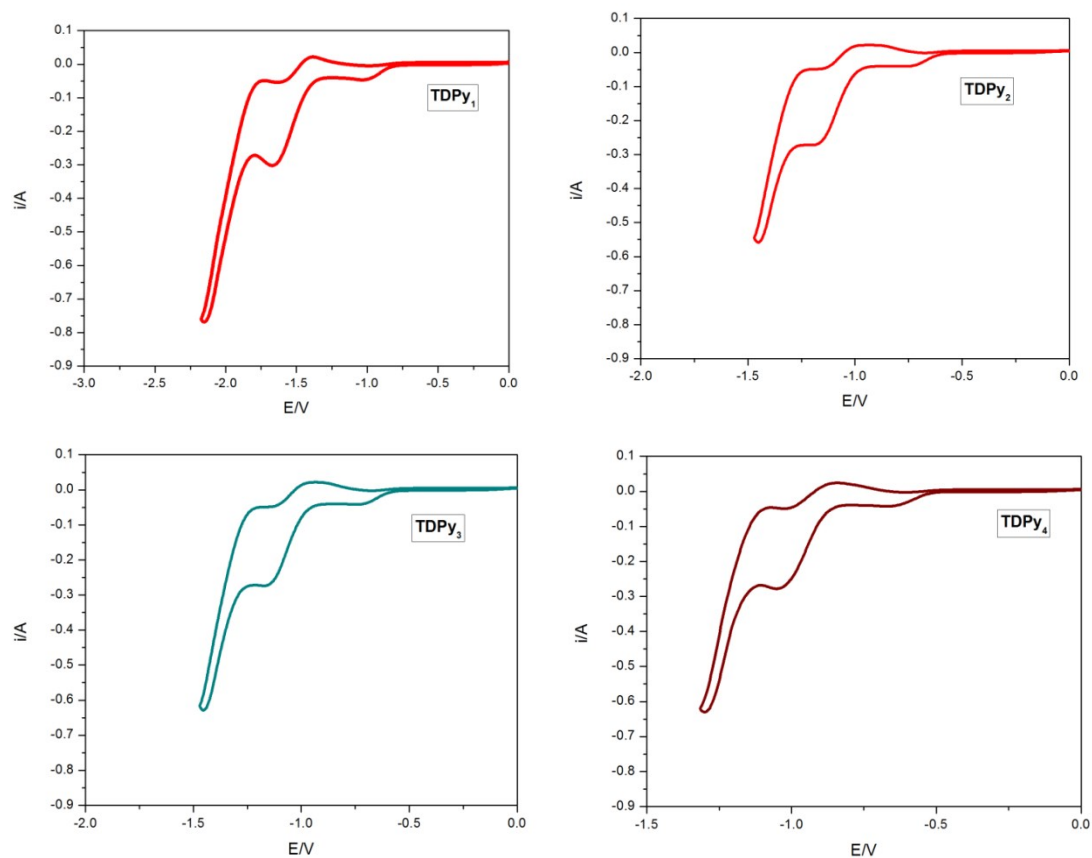

**Fig S17:** Cyclic voltamograms of polymers TDPy<sub>1-4</sub>

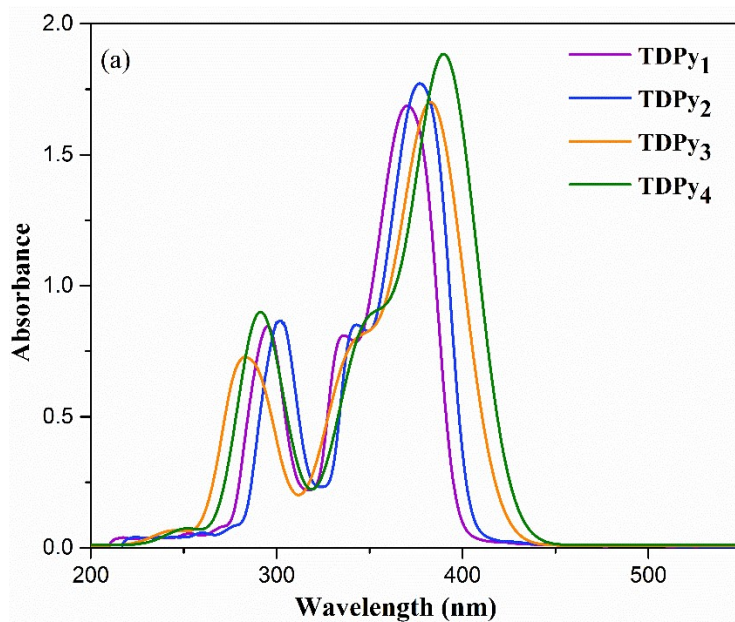

**Fig S18: (a)** UV-vis absorption spectra of polymers TDPy<sub>1-4</sub> in solution state

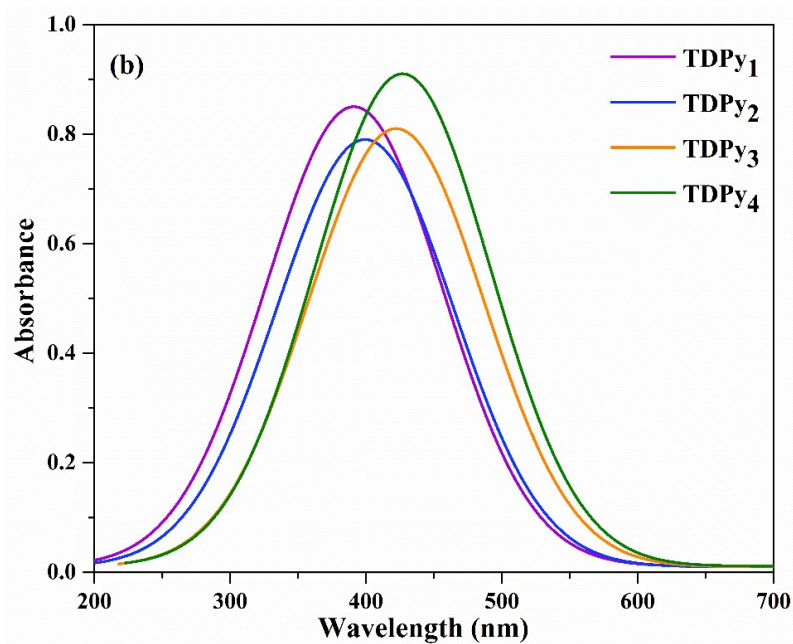

Fig S18: (b) UV-vis absorption spectra of polymers TDPy<sub>1-4</sub> in film state

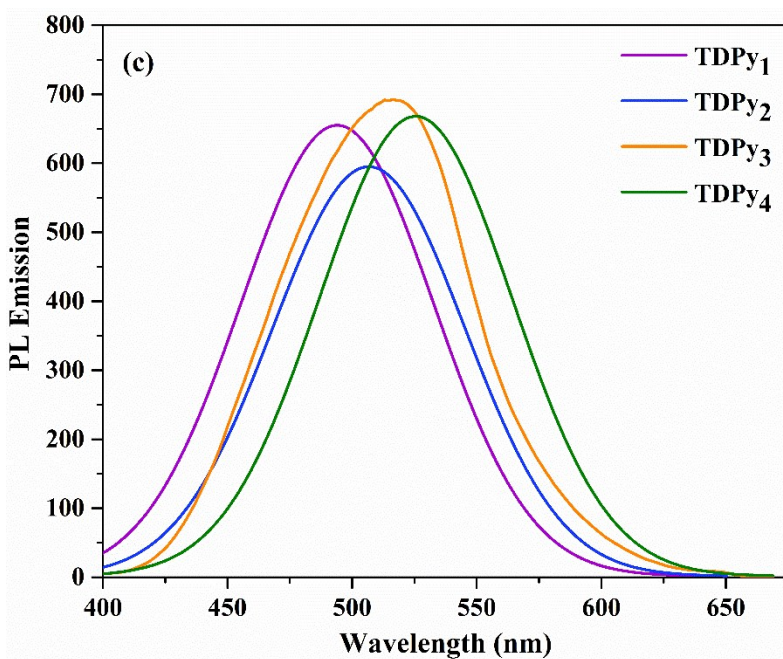

Fig S18: (c) PL emission spectra of polymers TDPy<sub>1-4</sub> in solution (THF)

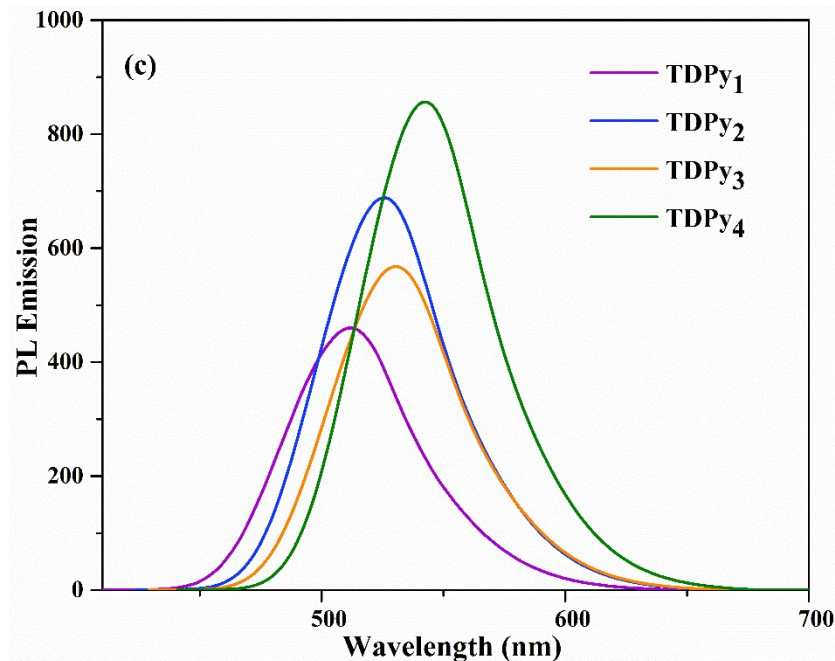

Fig S18: (d) PL emission spectra of polymers TDPy<sub>1-4</sub> in film state

#### 4. DFT Calculations

##### 4.1 Cartesian coordinates of the polymer TDPy<sub>1</sub>

| ATOM | CARTESIAN COORDINATES |                   |                   |
|------|-----------------------|-------------------|-------------------|
| 1 n  | 7.51197802867245      | 4.26841610178193  | 0.05248880909229  |
| 2 c  | 6.68149552311365      | 1.88270139382775  | 0.16792303776909  |
| 3 c  | 8.34396612577010      | -0.12009936965931 | 0.63310107219312  |
| 4 c  | 10.86874544673859     | 0.35801121689119  | 1.16752320573641  |
| 5 c  | 11.69376238696886     | 2.90274789364439  | 1.16683995553343  |
| 6 c  | 9.91367449557519      | 4.78802309261410  | 0.47974658812195  |
| 7 c  | 3.94943177473175      | 1.48184775301882  | -0.29611662875276 |
| 8 c  | 12.59794422273307     | -1.77087483247333 | 1.74154249709907  |
| 9 c  | 2.48435217002516      | 3.42695354910371  | -1.33354562136104 |
| 10 c | -0.07381392539708     | 3.10397242651231  | -1.78319701830522 |
| 11 c | -1.28029904370389     | 0.81271593747886  | -1.22440304959483 |
| 12 c | 0.18205067621647      | -1.12047912776230 | -0.15498822378265 |
| 13 c | 2.74024837209059      | -0.79573315713032 | 0.29912459679479  |
| 14 c | 11.88004618116071     | -3.64346133293719 | 3.46484079463190  |
| 15 c | 13.46374889499448     | -5.67035771140810 | 3.98502017258513  |

|      |                    |                   |                   |
|------|--------------------|-------------------|-------------------|
| 16 c | 15.80602680450772  | -5.91383911998506 | 2.79403308716085  |
| 17 c | 16.50506413132597  | -4.05370264150802 | 1.05588436995767  |
| 18 c | 14.94194767900715  | -2.01049421548972 | 0.54460621938994  |
| 19 c | -3.98798804642411  | 0.39075710421467  | -1.76970298751448 |
| 20 c | 17.55000836238587  | -8.08060137494233 | 3.40509285048423  |
| 21 c | -4.86251419646875  | -1.88948317897097 | -2.65740835051687 |
| 22 c | -7.45290452148308  | -2.38413868364503 | -3.19062376064950 |
| 23 c | -9.32041513896059  | -0.62456996011381 | -2.86624697544094 |
| 24 c | -8.51947830330912  | 1.78273967547575  | -1.93983014479658 |
| 25 c | -5.87766672988995  | 2.30703983856728  | -1.40167835059558 |
| 26 c | -12.05467192197964 | -1.11073962694871 | -3.42407050496591 |
| 27 n | -10.05388967684600 | 3.72608836532793  | -1.47849778535010 |
| 28 s | -8.26109554616916  | 6.05091698700695  | -0.42754251937670 |
| 29 n | -5.48409302612534  | 4.63766546961862  | -0.53301502020564 |
| 30 o | 10.44145368074019  | 7.27206597638368  | 0.28058920207217  |
| 31 c | 12.86019807129476  | 8.16905891826089  | -0.56036145046179 |
| 32 c | 14.13901202433838  | 3.53364327254690  | 2.09590663377272  |
| 33 n | 16.09379790581108  | 4.06022885184195  | 2.91359290009979  |
| 34 h | 7.70192740129171   | -2.05438905600213 | 0.54434201410410  |
| 35 h | 3.39349080938131   | 5.20119297619191  | -1.78141283676287 |
| 36 h | -1.15146747730838  | 4.64225826605524  | -2.58396639253155 |
| 37 h | -0.70961909145527  | -2.88218297603429 | 0.38314460167679  |
| 38 h | 3.77690315369392   | -2.32225359023676 | 1.18137428185765  |
| 39 h | 10.08649186288586  | -3.48741015653788 | 4.43978732329516  |
| 40 h | 12.87093507287375  | -7.08296418875846 | 5.34603472440412  |
| 41 h | 18.30333489096338  | -4.20292794302055 | 0.08525229365277  |
| 42 h | 15.53687838854762  | -0.60992395872806 | -0.82272135860538 |
| 43 h | 16.49969710583967  | -9.73867260193187 | 4.03824931584846  |
| 44 h | 18.68138776751324  | -8.62019690672387 | 1.76744016909513  |
| 45 h | 18.86214920253539  | -7.56322653393410 | 4.91755451946489  |
| 46 h | -3.51564153078867  | -3.38732935783612 | -3.01975040444348 |

|      |                    |                   |                   |
|------|--------------------|-------------------|-------------------|
| 47 h | -7.94791786320831  | -4.24218853352273 | -3.89877644436380 |
| 48 h | -12.76859090072145 | 0.21692353006753  | -4.83604938386352 |
| 49 h | -12.33387509044878 | -3.02874664865583 | -4.12268480317718 |
| 50 h | -13.21135822364440 | -0.84902044497542 | -1.73335763394823 |
| 51 h | 12.48581425177028  | 10.00189371544681 | -1.41423195259446 |
| 52 h | 14.17133135998788  | 8.38624068524043  | 1.00915731772048  |
| 53 h | 13.67181790143265  | 6.90490254804929  | -1.97475240125417 |

#### 4.2 Cartesian coordinates of the polymer **TDPy<sub>2</sub>**

| ATOM | CARTESIAN COORDINATES |                   |                   |
|------|-----------------------|-------------------|-------------------|
| 1 n  | -28.81787209557776    | -0.00728935362425 | -2.02821102478397 |
| 2 c  | -31.07034280952243    | 0.32611370775006  | -0.87336692758397 |
| 3 c  | -31.39324023293652    | 2.11040583857051  | 1.03145137128877  |
| 4 c  | -29.38427003066686    | 3.66594032842914  | 1.78244686974499  |
| 5 c  | -27.05130784136233    | 3.32473759149024  | 0.54868174199052  |
| 6 c  | -26.90824795375151    | 1.41876041759431  | -1.33823179662296 |
| 7 c  | -33.10604341388002    | -1.32738686513775 | -1.71978474245963 |
| 8 c  | -29.84386351279671    | 5.53838589704346  | 3.76594724050953  |
| 9 c  | -32.95329327220526    | -3.22169580313348 | -3.48543216013148 |
| 10 c | -35.25632418317495    | -4.49543546077649 | -3.91174370026151 |
| 11 c | -37.23499738891773    | -3.61014776772174 | -2.47168965138747 |
| 12 s | -36.20150997944442    | -1.09097046257682 | -0.55222189693120 |
| 13 c | -32.05649557862465    | 6.82981087862975  | 4.17754618948868  |
| 14 c | -31.98674374287851    | 8.44322923471777  | 6.31304996130150  |
| 15 c | -29.73630847799244    | 8.38940347619692  | 7.58133969521489  |
| 16 s | -27.61843866280411    | 6.33906008392737  | 6.10085969239272  |
| 17 c | -39.84670133555963    | -4.47243432053811 | -2.36032389383433 |
| 18 c | -28.98893697962345    | 9.83271572387673  | 9.89362848889487  |
| 19 c | -41.48126820246002    | -3.74608277700096 | -0.46349626550060 |
| 20 c | -44.03913156189719    | -4.54178482619007 | -0.31121914018875 |
| 21 c | -45.13069181537053    | -6.13259099109307 | -2.03586502840441 |
| 22 c | -43.52606562871757    | -6.95992924529163 | -4.04301240650539 |

|      |                    |                   |                   |
|------|--------------------|-------------------|-------------------|
| 23 c | -40.90625151720427 | -6.15051434909372 | -4.22810628079414 |
| 24 c | -47.82261269833246 | -6.99906001118441 | -1.89518072137210 |
| 25 n | -44.24233840013337 | -8.50310934934974 | -5.89928464596613 |
| 26 s | -41.76690679144808 | -8.89798188000808 | -7.74897748135501 |
| 27 n | -39.71548176530777 | -7.10639636435615 | -6.22690207512774 |
| 28 c | -24.87209768454209 | 4.82497667838460  | 1.01638608059309  |
| 29 n | -23.07700396348954 | 6.02364830034042  | 1.34086086722791  |
| 30 o | -24.65404390510381 | 1.13100580013054  | -2.45690036220135 |
| 31 c | -24.42218173066322 | -0.73306294537494 | -4.41058993815383 |
| 32 h | -33.18404025115212 | 2.27001606119191  | 1.99803905750969  |
| 33 h | -31.20266929528610 | -3.66524928146749 | -4.43527730649884 |
| 34 h | -35.48408686161514 | -6.02311923523908 | -5.24036678028662 |
| 35 h | -33.67935182831343 | 6.66397021238619  | 2.94654838127831  |
| 36 h | -33.55503352405427 | 9.62010801656825  | 6.89293614958018  |
| 37 h | -30.58505738309764 | 10.95471203823151 | 10.55838378444012 |
| 38 h | -28.40930198981152 | 8.57757492832653  | 11.42793240961189 |
| 39 h | -27.41835378895881 | 11.11971410373946 | 9.51559313606180  |
| 40 h | -40.79491376487036 | -2.51462886840844 | 1.02058122442797  |
| 41 h | -45.15987058844865 | -3.85626126749728 | 1.26081900345539  |
| 42 h | -47.93224257395933 | -9.05918632495101 | -1.79157236754572 |
| 43 h | -48.76572832510342 | -6.20518361608399 | -0.24470410868438 |
| 44 h | -48.86890934216147 | -6.43962137159676 | -3.58596852101866 |
| 45 h | -22.46875117850702 | -0.60554601159792 | -5.03252473879803 |
| 46 h | -24.82431048088931 | -2.61655192952327 | -3.67812733950133 |
| 47   | -25.70526666096957 | -0.32364180063899 | -5.96983112433364 |

#### 4.3 Cartesian coordinates of the polymer **TDPy<sub>3</sub>**

| ATOM | CARTESIAN COORDINATES |                   |                   |
|------|-----------------------|-------------------|-------------------|
| 1 n  | -20.03262293552890    | -2.07339459087150 | -1.41346597781957 |
| 2 c  | -21.75252869453379    | -0.37804592752307 | -0.60236616482902 |
| 3 c  | -21.06935190730324    | 2.10892727354505  | -0.07507266280531 |
| 4 c  | -18.56058122037199    | 2.90148839305931  | -0.32650112428292 |



|      |                    |                    |                   |
|------|--------------------|--------------------|-------------------|
| 5 c  | -16.77886212818609 | 1.10610338692262   | -1.13000908795377 |
| 6 c  | -17.66324567989456 | -1.36752813861790  | -1.66493127325582 |
| 7 c  | -24.38873404747794 | -1.28793246384187  | -0.35865087067437 |
| 8 c  | -17.88192500438947 | 5.55944100970487   | 0.24262750172744  |
| 9 c  | -25.13798300355500 | -3.52644750371739  | -1.55458166388567 |
| 10 c | -27.59210359673407 | -4.41580066858791  | -1.35846549940794 |
| 11 c | -29.41314406548381 | -3.09195502130733  | 0.03617136075348  |
| 12 c | -28.65482445050237 | -0.86746170573588  | 1.25863730825416  |
| 13 c | -26.19759025077860 | 0.01541091913604   | 1.06801765244029  |
| 14 c | -18.76335632191797 | 6.71076074013875   | 2.45287393734796  |
| 15 c | -18.17681232266927 | 9.21136804537356   | 2.99326268963266  |
| 16 c | -16.71435706602415 | 10.65769827276064  | 1.34122266812874  |
| 17 c | -15.85949576305685 | 9.50841297564456   | -0.87674135050339 |
| 18 c | -16.41513316105400 | 7.00334736425345   | -1.41673117421595 |
| 19 c | -32.06841385380442 | -3.94640503138469  | 0.19565179233197  |
| 20 c | -16.03416860862225 | 13.35518186771160  | 1.94799281188911  |
| 21 c | -34.03108750147338 | -2.25704279513378  | 0.13417855394927  |
| 22 c | -36.62801854878424 | -2.97420396630399  | 0.29521993246850  |
| 23 c | -37.37752647604881 | -5.49614948147550  | 0.53057558564007  |
| 24 c | -35.37917161289365 | -7.33229492394836  | 0.61395795174728  |
| 25 c | -32.74868193014811 | -6.57593687626231  | 0.43671626067048  |
| 26 n | -35.70977182604745 | -9.80665226719504  | 0.86418127471833  |
| 27 s | -32.86638504342172 | -11.09905124878094 | 0.88225278295308  |
| 28 n | -31.14958349032060 | -8.50888151456950  | 0.57191369623904  |
| 29 c | -38.62494738891635 | -1.13077610284883  | 0.20032148793384  |
| 30 c | -41.24361055866941 | -1.90801458094686  | 0.34950235091851  |
| 31 c | -41.92376222519325 | -4.52495866233705  | 0.59879501510938  |
| 32 c | -39.98329161140572 | -6.22013664689598  | 0.68084773052873  |
| 33 n | -38.31363524396942 | 1.34745637433045   | -0.02249483026767 |
| 34 s | -41.17406308814449 | 2.61555610770956   | -0.04481954153858 |
| 35 n | -42.87010877471435 | 0.00269699994763   | 0.23340889885186  |

|      |                    |                   |                   |
|------|--------------------|-------------------|-------------------|
| 36 c | -44.65225002806240 | -5.26970435609683 | 0.75472023654824  |
| 37 o | -15.92470804737669 | -3.03715019279830 | -2.44593855317486 |
| 38 c | -16.72587114942633 | -5.57521437758005 | -2.96054163455870 |
| 39 c | -14.14933604041022 | 1.63215601505393  | -1.34790732316802 |
| 40 n | -12.01030634483545 | 2.02442730287483  | -1.52615712898650 |
| 41 h | -22.48206359552829 | 3.48074390126776  | 0.45702005902364  |
| 42 h | -23.75989560416205 | -4.56085445084851 | -2.65184548436472 |
| 43 h | -28.10821864456105 | -6.14902084202863 | -2.30689012594584 |
| 44 h | -29.99401184796004 | 0.15492554097962  | 2.42029567228743  |
| 45 h | -25.68373477302275 | 1.70813779744424  | 2.09469666952088  |
| 46 h | -19.87996883688999 | 5.62702634254383  | 3.78353927366536  |
| 47 h | -18.86414828318858 | 10.04896261560391 | 4.73254830608561  |
| 48 h | -14.73817488355921 | 10.59046544121117 | -2.20740351028712 |
| 49 h | -15.73004659795056 | 6.17865365660912  | -3.15796969318744 |
| 50 h | -17.33478720337330 | 14.16879514935432 | 3.32539703892421  |
| 51 h | -14.12935718356138 | 13.47212198134504 | 2.74465464724098  |
| 52 h | -16.06459331113765 | 14.53686779215225 | 0.25710512065441  |
| 53 h | -33.63862788191215 | -0.26331350967597 | -0.09445255439566 |
| 54 h | -40.38531165290795 | -8.21816399778432 | 0.86634876636397  |
| 55 h | -45.56976043387647 | -4.36856711731710 | 2.37077832603724  |
| 56 h | -45.68152882574720 | -4.65153168607590 | -0.92587005594785 |
| 57 h | -44.84925397972346 | -7.31182610231167 | 0.93616327651216  |
| 58 h | -15.01075377654577 | -6.57272262719216 | -3.49192906653757 |
| 59 h | -17.57403513006124 | -6.43041636535462 | -1.28940782598575 |
| 60   | -18.08747865897753 | -5.61414804336973 | -4.50692372844407 |

#### 4.4 Cartesian coordinates of the polymer **TDPy<sub>4</sub>**

| ATOM | CARTESIAN COORDINATES |                  |                   |
|------|-----------------------|------------------|-------------------|
| 1 n  | -30.95939631181428    | 2.15233010872340 | -0.99334470939324 |
| 2 c  | -33.46972046631649    | 2.02373916681010 | -0.66896696962161 |
| 3 c  | -34.97298593689713    | 4.19503890390020 | -0.59130539335859 |
| 4 c  | -33.90147948354745    | 6.55371123156451 | -1.04510987402810 |

|      |                    |                    |                   |
|------|--------------------|--------------------|-------------------|
| 5 c  | -31.26728532386833 | 6.65677994324127   | -1.52719198512430 |
| 6 c  | -29.87496771096672 | 4.36536667082316   | -1.35836211748434 |
| 7 c  | -34.50878826092406 | -0.50773150522924  | -0.33342978779808 |
| 8 c  | -35.54633103021289 | 8.77987631664373   | -1.05732655153099 |
| 9 c  | -33.19089683839425 | -2.74281658105416  | -0.29339782130289 |
| 10 c | -34.72557289153883 | -4.89165690738034  | 0.06387336496524  |
| 11 c | -37.26303087662160 | -4.35111078755865  | 0.29850426682536  |
| 12 s | -37.74801716352498 | -1.06246448161783  | 0.08936181904422  |
| 13 c | -37.94640737794162 | 8.93146757266238   | -2.02233957959965 |
| 14 c | -39.11533880340111 | 11.31251529524403  | -1.63846462212386 |
| 15 c | -37.64342041132479 | 12.99908852610023  | -0.34980839397221 |
| 16 s | -34.72075003082239 | 11.65433405286830  | 0.38978035564060  |
| 17 c | -39.39643278221829 | -6.05240056769121  | 0.64941609725094  |
| 18 c | -38.25247968577978 | 15.65891579218203  | 0.38864984435533  |
| 19 c | -41.85718759541219 | -5.24667348144878  | 0.41268921001538  |
| 20 c | -43.99995096336055 | -6.83305594833793  | 0.76548727778811  |
| 21 c | -43.77258393455953 | -9.39496392077870  | 1.37153930356453  |
| 22 c | -41.23814239542171 | -10.33516256684886 | 1.61620267759481  |
| 23 c | -39.06416450231009 | -8.69473606652280  | 1.27782588265067  |
| 24 n | -40.64171850859925 | -12.70494679395084 | 2.18192550751716  |
| 25 s | -37.52686512438640 | -12.86035196033971 | 2.27698836069170  |
| 26 n | -36.87599540597955 | -9.88200927153804  | 1.59724711148400  |
| 27 c | -46.53553869409941 | -5.87973687454765  | 0.50708263419746  |
| 28 c | -48.68474311243935 | -7.53300837486119  | 0.86603315475818  |
| 29 c | -48.35651996155914 | -10.15456408617283 | 1.49025525524690  |
| 30 c | -45.92823836984142 | -10.99295475022432 | 1.71923718767328  |
| 31 n | -47.15487121281348 | -3.51780505457379  | -0.05892324023317 |
| 32 s | -50.28097410278708 | -3.39962198938510  | -0.13131947291340 |
| 33 n | -50.89898241923314 | -6.38534924247057  | 0.56438249798365  |
| 34 c | -50.62013505314761 | -11.81678424608174 | 1.85502339514718  |
| 35 o | -27.35098988401822 | 4.20548075381010   | -1.64985715236389 |

|      |                    |                    |                   |
|------|--------------------|--------------------|-------------------|
| 36 c | -25.67734914396232 | 6.15284260471157   | -0.76479961796577 |
| 37 c | -30.12373617325769 | 8.89973169722630   | -2.46814791019956 |
| 38 n | -29.18030090359908 | 10.67461328836763  | -3.32147067139117 |
| 39 h | -36.96521091313058 | 4.07128042499541   | -0.15975911299719 |
| 40 h | -31.16301844733604 | -2.79364782406155  | -0.51928349872050 |
| 41 h | -34.01080130559976 | -6.79715962495006  | 0.15883423251248  |
| 42 h | -38.83102632719979 | 7.38837263758118   | -3.02907455823642 |
| 43 h | -40.99309702807862 | 11.77023413818103  | -2.30593752673976 |
| 44 h | -40.16555787676380 | 16.12689123628383  | -0.21881778501936 |
| 45 h | -38.14980769806674 | 15.93083425747246  | 2.43357086989107  |
| 46 h | -36.95774719535294 | 17.00965358328925  | -0.48588015878214 |
| 47 h | -42.24547908956880 | -3.30033428359559  | -0.08306326745422 |
| 48 h | -45.57013071889386 | -12.95278397445461 | 2.18769337982206  |
| 49 h | -51.82465126958836 | -11.09873597677706 | 3.37170890674592  |
| 50 h | -51.78460799324382 | -11.85907254098788 | 0.14972204355032  |
| 51 h | -50.05377988285143 | -13.74221840627358 | 2.31704388995716  |
| 52 h | -23.92455922099314 | 5.18494885722720   | -0.29576094295755 |
| 53 h | -25.33012280322350 | 7.56141911032447   | -2.22202331308269 |
| 54 h | -26.43064232099488 | 7.06858430680095   | 0.92320108886982  |

## 5. Device fabrication

PLED devices fabricated with a configuration of ITO/PEDOT:PSS/Polymer/Al were used to investigate the electroluminescent (EL) behavior of the polymers **TDPy<sub>1-4</sub>** as emissive materials for polymer light emitting diodes. The device fabrication follows sandwich type of structure with poly(3,4-ethylenedioxythiophene):poly(styrenesulphonate) (PEDOT: PSS) coated indium tin oxide (ITO) glass as the anode, the spin coated newly synthesized polymer as the emissive layer and aluminum as the cathode. To fabricate PLEDs of device configuration ITO/PEDOT: PSS/polymer/Al, first the indium tin oxide (ITO) coated glass substrates with a sheet resistance of 20  $\Omega$ /square and a thickness (ITO) of 120 nm were cleaned using deionized water, acetone, trichloroethylene and isopropyl alcohol sequentially for about 30 min each using an ultrasonic bath and dried in a vacuum oven. Then ITO surface was treated with oxygen plasma for about 10 min to increase its work function. Later, a hole injection layer of PEDOT:

PSS was spin coated on the cleaned and patterned ITO substrate at 4000 rpm with about 50-60 nm in thickness and was dried by baking at 120 °C in vacuum for 50 min. Then, the emitting polymer layer was spin cast onto the PEDOT: PSS layer at a speed of 2000 rpm from chlorobenzene solution (10 mg/mL) through a 0.45 µm teflon filter, followed by vacuum annealing at 150 °C for ~2 h in order to remove the organic fraction. Finally, the coated ITO was transferred to a deposition chamber, where a layer of Al electrode was vacuum deposited on the polymer layer with about 200 nm in thickness by thermal evaporation method at a pressure of  $1 \times 10^{-6}$  Torr. Four pixels, each of active area of 4×4 mm<sup>2</sup> were defined per substrate and used to assess the reproducibility of the device performance. The complete fabricated devices were finally annealed at 100 °C in vacuum for 5 min before being characterized. All the characterizations of the light-emitting diode devices were carried out at room temperature under ambient conditions without protective encapsulation.
